# Supplementary material for: The Dual Functions of a Bracovirus C-Type Lectin in Caterpillar Immune Response Manipulation
Source: Front Immunol. 2022 May 18;13:877027. doi: 10.3389/fimmu.2022.877027 (PMC9157488; doi:10.3389/fimmu.2022.877027)
Supplement: Supplementary file 2 [file DataSheet_2.xlsx]

## Sheet: S1
Table S1. Summary of output statistics from hemocytes transcriptome of parasitized P. xylostella by C. vestalis at 1 h, 6 h, 12 h, 24 h, 72 h and 120 h post parasitization with three biological replications
Samples	Total Raw Reads	Total Clean Reads	Clean Reads Rate(%)	Clean Bases Number	Raw Q30 Bases Rate(%)	Clean Q30 Bases Rate(%)	bioproject_accession	biosample_accession	accession
pxy-p-H-1h1	47243790	46264716	97.93	6939707400	94.65	94.95	PRJNA799668	SAMN25185395	SRR17712279
pxy-p-H-1h2	44921298	44062428	98.09	6609364200	94.42	94.69	PRJNA799668	SAMN25185396	SRR17712278
pxy-p-H-1h3	46805252	45198852	96.57	6779827800	94.22	94.57	PRJNA799668	SAMN25185397	SRR17712269
pxy-p-H-6h1	46972644	45974074	97.87	6896111100	94.22	94.45	PRJNA799668	SAMN25185398	SRR17712268
pxy-p-H-6h2	48110556	46644592	96.95	6996688800	94.55	94.9	PRJNA799668	SAMN25185399	SRR17712267
pxy-p-H-6h3	46432658	45458830	97.9	6818824500	94.36	94.7	PRJNA799668	SAMN25185400	SRR17712266
pxy-p-H-12h1	44888536	44181940	98.43	6627291000	94.33	94.56	PRJNA799668	SAMN25185401	SRR17712265
pxy-p-H-12h2	40094194	39345132	98.13	5901769800	94.15	94.41	PRJNA799668	SAMN25185402	SRR17712264
pxy-p-H-12h3	44460088	43137832	97.03	6470674800	94.74	94.95	PRJNA799668	SAMN25185403	SRR17712263
pxy-p-H-24h1	47859378	47116726	98.45	7067508900	93.93	94.19	PRJNA799668	SAMN25185404	SRR17712262
pxy-p-H-24h2	45837460	45133548	98.46	6770032200	94.5	94.74	PRJNA799668	SAMN25185405	SRR17712277
pxy-p-H-24h3	45046668	44208898	98.14	6631334700	94.3	94.64	PRJNA799668	SAMN25185406	SRR17712276
pxy-p-H-72h1	48164686	47236852	98.07	7085527800	94.11	94.33	PRJNA799668	SAMN25185407	SRR17712275
pxy-p-H-72h2	48538614	47699532	98.27	7154929800	94	94.23	PRJNA799668	SAMN25185408	SRR17712274
pxy-p-H-72h3	42849306	42137786	98.34	6320667900	94.13	94.3	PRJNA799668	SAMN25185409	SRR17712273
pxy-p-H-120h1	48559956	47706030	98.24	7155904500	94.26	94.43	PRJNA799668	SAMN25185410	SRR17712272
pxy-p-H-120h2	46343118	45343380	97.84	6801507000	94.17	94.34	PRJNA799668	SAMN25185411	SRR17712271
pxy-p-H-120h3	42913658	42189440	98.31	6328416000	94.1	94.26	PRJNA799668	SAMN25185412	SRR17712270

## Sheet: S2
Table S2. Standardized FPKM of CvBV genes with natural logarithm from hemocytes transcriptome of parasitized P. xylostella by C. vestalis at 1 h, 6 h, 12 h, 24 h, 72 h and 120 h post parasitization with three biological replications
CvBV_gene	gene_annotation	pxy-p-H-1h1	pxy-p-H-1h2	pxy-p-H-1h3	pxy-p-H-6h1	pxy-p-H-6h2	pxy-p-H-6h3	pxy-p-H-12h1	pxy-p-H-12h2	pxy-p-H-12h3	pxy-p-H-24h1	pxy-p-H-24h2	pxy-p-H-24h3	pxy-p-H-72h1	pxy-p-H-72h2	pxy-p-H-72h3	pxy-p-H-120h1	pxy-p-H-120h2	pxy-p-H-120h3	pxy-p-H-sum	rank
CvBV_22-6	PTP	10.3159	10.5862	10.3812	12.7063	12.1733	12.0204	13.0947	13.2676	13.1561	13.3629	13.7335	13.6816	13.2692	13.2998	13.3516	12.8608	12.6554	13.3724	15.8887	1
CvBV_16-2	BV-like protein	10.494	10.6564	10.543	11.6806	11.6605	11.5309	12.1368	11.9463	12.0557	12.2072	11.6677	11.9411	11.0622	11.006	10.6775	11.3736	11.8659	11.1671	14.459	2
CvBV_16-8	lectin	11.2345	11.5262	11.2733	11.4859	11.6036	11.5049	11.7263	11.2548	11.4293	11.6478	11.6782	11.8149	11.4621	11.5662	10.2946	11.5631	11.3715	10.3723	14.3322	3
CvBV_28-6	CrV1-like protein	11.5487	11.3013	11.069	11.2734	11.3734	11.2933	11.076	11.4721	10.8654	10.9918	11.0004	10.5712	11.4363	11.3191	11.6493	12.0659	11.6402	11.8051	14.2709	4
CvBV_21-5	EP-like protein	9.27464	9.06257	9.01522	10.9306	10.6729	10.326	11.25	10.9081	11.6254	11.4155	11.1536	11.4223	12.4038	12.0503	11.0594	11.3797	11.7193	10.8994	14.1487	5
CvBV_09-2	BV-like protein	9.89872	10.1458	10.0063	11.9489	11.3942	11.6161	11.8289	11.2277	11.8047	11.2169	11.1997	11.4475	10.8493	10.5683	10.2273	10.6383	10.7453	10.2665	14.034	6
CvBV_18-1	BV-like protein	11.9124	11.7756	11.943	11.3009	11.6034	11.452	10.5318	10.8484	10.1728	9.83438	10.1487	9.99851	10.2027	10.7278	9.6359	11.1751	11.9313	9.89184	14.0222	7
CvBV_18-4	BV-like protein	11.7216	11.4372	11.2662	11.625	11.8027	11.5779	11.2362	11.0783	10.7731	10.5353	10.7794	10.728	10.3462	10.0498	9.75982	10.2253	10.4511	8.65655	13.9156	8
CvBV_28-1	lectin	12.1064	12.1189	12.0041	11.0339	11.3941	10.8652	9.91134	10.4598	9.83363	9.26798	9.87296	9.14046	6.54449	7.88451	5.78932	8.3686	9.10777	6.45274	13.6664	9
CvBV_18-8	EP-like protein	11.9027	11.8063	11.6323	11.2107	11.5316	11.0963	10.2124	10.2925	9.87874	9.87991	9.31519	9.4817	8.82343	8.95059	8.0721	9.55541	10.8756	8.14297	13.6463	10
CvBV_09-1	BV-like protein	10.7782	10.9538	10.2177	11.2433	11.3455	12.0844	11.1821	10.7831	11.4089	11.1193	10.2285	10.2278	8.50047	8.75282	8.57923	7.72438	7.50285	6.86266	13.6233	11
CvBV_16-3	BV-like protein	10.535	10.5298	9.94954	11.2819	11.328	10.9537	11.1039	11.1123	10.8444	10.7342	10.6772	10.6967	10.4249	10.113	9.02061	10.3372	10.6769	9.40373	13.5756	12
CvBV_18-5	BV-like protein	10.7131	10.6617	10.4545	10.6348	10.99	10.9169	10.717	10.5726	10.8013	10.9624	10.3147	10.2453	10.0453	10.5753	9.79232	11.0514	11.3273	8.87219	13.5422	13
CvBV_26-7	BV-like protein	10.3218	10.4569	10.6629	11.5248	11.0174	11.0941	11.0793	10.8945	11.0802	10.6241	10.2797	10.6755	9.66066	8.91263	8.28164	8.05074	8.61576	7.85091	13.4168	14
CvBV_09-5	EP-like protein	11.0262	11.056	10.8891	11.046	11.0901	11.1846	10.8283	10.6373	10.5419	10.2356	9.64564	9.88899	8.12269	8.04257	7.64587	7.2632	7.5816	7.18447	13.2792	15
CvBV_11-2	BV-like protein	11.4744	11.1577	10.6631	10.7684	11.0847	10.7155	9.88598	10.13	9.25463	8.94887	9.12197	8.65919	7.2014	6.34395	6.27621	6.35571	6.1736	6.44373	13.0142	16
CvBV_14-4	BV-like protein	11.7215	11.6873	11.4741	9.58963	10.1713	9.8067	7.67238	8.82596	7.86523	7.51169	8.15753	7.31733	5.98658	5.12063	4.50048	4.93282	6.7148	0	12.9417	17
CvBV_27-5	p94-like protein	8.4522	8.66614	7.95633	8.64502	9.12509	8.39791	8.41393	8.26832	8.45017	9.0429	8.56173	8.93124	10.575	10.6351	9.96751	10.5257	10.6047	10.8555	12.6062	18
CvBV_16-7	Hyp	10.1207	10.2675	9.20833	9.42252	10.1243	10.2217	8.99795	8.75817	8.69534	9.67471	8.9735	9.26779	9.60646	9.29499	8.32906	9.82319	10.2293	8.81336	12.4912	19
CvBV_11-1	BV-like protein	10.3287	10.2211	9.6472	10.3542	10.3991	10.0369	9.41451	9.83235	9.0035	7.86419	8.95045	8.45225	8.19871	6.74093	6.86201	5.82331	7.33502	6.11492	12.3123	20
CvBV_17-2	PTP	6.74444	6.81054	6.95449	8.04381	7.98439	6.87984	7.32896	7.95295	7.58545	7.66771	8.25208	8.38976	10.5941	10.3212	9.92582	10.3395	9.69306	10.9635	12.311	21
CvBV_18-6	BV-like protein	9.267	9.31832	8.78202	9.64679	9.83922	9.5623	9.51874	9.38413	9.70025	9.81665	9.04063	9.17799	8.90079	9.34513	8.86231	9.22378	9.85271	8.25079	12.2728	22
CvBV_27-4	EP-like protein	10.492	10.8982	10.2795	9.81484	10.0682	9.54052	8.42255	9.08482	8.17421	7.26955	7.67331	7.32729	7.22293	7.64365	7.27306	7.90437	7.40151	7.77265	12.2485	23
CvBV_15-5	BV-like protein	7.63451	7.16571	6.03136	7.81165	8.22381	7.89219	7.95279	7.97676	7.58823	7.78605	8.61936	8.56426	10.24	10.726	9.68266	10.1408	10.5314	9.91572	12.2366	24
CvBV_22-4	PTP	8.95302	9.34872	9.51049	8.96607	8.64331	8.55694	9.73458	9.76041	9.69357	9.63894	9.66811	9.7705	9.19658	9.40832	9.22174	8.64188	8.5289	8.80885	12.2066	25
CvBV_12-1	BV-like protein	4.28483	4.61472	4.39321	5.23931	3.1604	3.92612	4.37311	4.6885	5.44471	6.07134	5.26951	6.07794	10.4207	10.3516	10.0552	10.775	10.3805	10.2188	12.1939	26
CvBV_27-10	histone H4-like protein	10.3458	10.3609	11.3272	7.72106	7.68642	6.56353	6.40993	8.05519	7.00756	6.26762	7.64547	7.0229	7.44559	8.38361	8.15189	7.47243	7.32029	9.2258	12.1145	27
CvBV_25-6	BEN	6.30744	6.28825	6.25841	7.01731	6.83291	7.19824	7.46896	7.10494	7.34208	8.29206	7.07902	7.56821	9.84262	10.0147	10.9432	10.066	9.96831	9.6874	12.0745	28
CvBV_26-4	BV-like protein	10.4693	10.662	10.6866	9.32302	9.53067	9.0885	8.41032	8.06056	8.08603	6.89658	6.39924	7.59031	6.18134	0	0	0	0	0	12.0463	29
CvBV_28-5	BV-like protein	10.1304	10.0746	10.2289	9.0886	9.16742	8.97833	8.35483	9.40364	8.28096	7.76835	9.04262	8.65418	7.90473	7.81782	7.82294	7.42491	7.38612	8.01886	11.9433	30
CvBV_11-3	BV-like protein	10.0386	9.96162	9.13549	10.139	10.0959	9.47996	8.84504	9.19796	8.45549	7.3814	8.14384	7.32904	6.83305	6.40853	5.14651	6.41134	7.08475	6.35871	11.9063	31
CvBV_19-3	BV-like protein	9.55672	8.67143	7.46932	9.26031	8.81209	9.90707	10.3899	8.3919	9.12217	8.43054	8.98017	9.63883	8.36658	7.63588	7.13785	6.54962	6.38161	6.52463	11.8678	32
CvBV_14-1	BV-like protein	9.74557	9.71121	9.63927	9.8412	9.75408	9.34211	9.2412	9.2799	8.76519	7.47769	8.21282	7.84193	7.15007	0	0	0	0	0	11.7987	33
CvBV_28-4	BV-like protein	8.02304	8.01578	8.2048	9.00145	8.70931	8.12943	8.41495	9.01695	8.62389	7.92484	8.31563	7.97122	8.76433	8.70537	9.47227	9.8765	9.43207	9.90685	11.7968	34
CvBV_10-2	BEN	7.67973	7.91077	7.6525	7.45341	7.2962	7.05078	7.27804	7.13662	7.24641	7.93139	6.9308	7.43832	9.70792	9.81673	9.83146	9.85662	9.60367	9.85378	11.7543	35
CvBV_13-7	PTP	7.48761	7.9364	8.8124	7.16161	6.42545	6.23429	6.59404	7.75234	7.11563	7.72043	7.69969	7.60572	9.51903	9.59822	9.71677	9.97818	9.43538	10.0711	11.7531	36
CvBV_19-7	BV-like protein	9.30699	8.62311	8.33329	9.15675	8.81094	9.73681	10.0684	8.42112	9.52233	8.32501	8.49921	9.22594	8.88419	7.25685	6.67538	5.65368	6.88968	7.03856	11.7493	37
CvBV_17-4	PTP	7.71975	7.80591	8.3341	7.06221	7.32673	6.07757	6.85252	7.41131	7.38642	7.25596	7.63583	7.59177	9.80939	10.1065	9.2194	9.7598	9.49855	9.90652	11.7377	38
CvBV_19-5	BV-like protein	8.76985	8.53036	8.56313	9.41349	8.9114	9.39181	9.67841	8.58676	9.12325	9.0601	8.58054	9.18021	7.84321	8.79992	6.88268	8.51663	0	0	11.6757	39
CvBV_14-2	BV-like protein	9.74204	9.44423	9.39314	9.58451	9.77306	9.33196	8.1805	8.79717	7.72941	7.61103	8.1547	7.45581	7.06172	0	0	0	5.40065	0	11.5724	40
CvBV_19-2	BEN	9.80296	9.89866	10.713	7.83529	8.06426	8.00202	7.50065	7.50796	7.41439	7.26074	5.75906	6.29493	5.55478	6.03773	7.26031	6.00206	6.01864	5.33999	11.5358	41
CvBV_28-3	BV-like protein	9.98559	9.75699	9.64253	7.62026	8.58399	8.04998	7.40783	8.03957	7.10285	7.33319	8.04469	7.34518	8.00312	7.7098	7.82876	8.73539	8.19951	8.60075	11.5139	42
CvBV_29-3	BV-like protein	5.50842	5.08957	0	6.58635	5.91055	6.08662	8.1243	7.75405	7.64663	7.38125	8.33558	8.66722	9.72035	9.70117	9.01007	9.6011	9.43174	9.20968	11.5105	43
CvBV_26-8	BV-like protein	9.12835	9.20808	8.99901	9.15603	8.87238	9.76807	9.35878	8.58069	8.85996	7.20673	7.83704	8.35468	6.3009	0	0	4.73988	0	5.41232	11.4547	44
CvBV_09-3	BV-like protein	7.85921	8.29425	8.38249	9.1441	8.8847	8.7252	9.19369	8.61169	9.27567	8.19795	8.24902	8.59378	8.66678	8.79996	7.89883	7.38193	7.47491	7.08352	11.4323	45
CvBV_16-9	BV-like protein	9.45881	9.80766	8.94158	8.63721	9.01953	8.37826	8.15619	8.27245	8.13395	8.57923	8.3512	8.14399	6.55068	7.4807	6.18105	8.46167	7.8506	6.57692	11.4259	46
CvBV_01-1	EP-like protein	9.0847	8.92243	8.81009	9.09488	9.11932	9.01353	8.5866	9.15215	8.34101	7.89856	8.46058	8.56786	7.53451	7.7571	6.90499	5.0269	6.13615	6.93043	11.3826	47
CvBV_18-3	BV-like protein	9.93364	10.0389	10.3488	5.97617	6.64773	6.21036	5.89435	6.47659	5.74524	6.10903	6.2881	5.71565	6.26762	6.81469	6.56274	5.70694	7.26987	5.40807	11.328	48
CvBV_08-1	BEN	9.7532	9.83213	10.2952	7.50717	7.66483	6.82238	6.78091	7.0232	6.40207	7.19131	6.09958	6.4461	7.08999	7.2962	7.40295	6.25949	5.60786	7.01729	11.3087	49
CvBV_22-5	PTP	6.7184	7.29325	7.49684	7.95102	7.68769	7.71632	9.07471	9.06428	8.97746	8.9674	8.49881	8.74195	7.78785	8.07881	9.307	7.77176	7.77581	7.98344	11.2899	50

## Sheet: S3
Table S3. Spatial structural features of BV-derived CTLs
Name	Ca2+ Coordinators	Motif	Carbohydrate	Carbohydrate Coordinators	C-score of carbohydrate Coordinators
CvBV_16-8	59,61,65,155	QPD	FUC	119,124,126,130,142,143,144	0.30
CvBV_28-1	57,59,63,155	QPS	BM3	122,124,126,130,142,143,144	0.48
CcBV31_135	59,61,65,157	QPS	FUC	89,124,126,132,138,144,145,150	0.47
CcBV32_307	59,61,65,157	QPD	FUC	120,122,124,125,132,144,145,146	0.45
CsBV-CTL	57,59,63,155	QPS	MAN	122,124,126,130,142,143,144	0.47
CrBV-CTL1	57,59,63,155	QPS	FUC	122,124,126,130,142,143,144	0.38
CrBV-CTL2	59,61,65,157	KPS	TRE	89,124,126,128,132,138,144,145,150	0.15
GfBV-CTL1	60,62,66,158	QPS	NGA	125,127,129,133,145,146,147	0.45
GfBV-CTL2	60,62,66,158	QPS	FUC	125,127,129,133,145,146,147	0.44
GfBV-CTL3	65,67,71,163	QPS	NGA	130,132,134,138,150,151,152	0.46
GiBV-CTL1	60,62,66,158	QPS	BM3	125,127,129,133,145,146,147	0.43
GiBV-CTL2	-	QPS	NGA	52,87,89,91,95,99,101,107,108	0.27

## Sheet: S4
Table S4. Summary of statistics in annotated CTLs protein sequences
Gene name	Gene ID	Data sources	Species	signal peptide	CRD number	family
CvBV_16-8	QZB49081.1	NCBI	Cotesia vestalis bracovirus	Y	1	CTL-S
CvBV_28-1	QZB49176.1	NCBI	Cotesia vestalis bracovirus	Y	1	CTL-S
CcBV31_135	Cc_GSCOCT000130750012-PA gene=cc_ccv31_135	ParWaspDB(https://bipaa.genouest.org/is/parwaspdb/)	Cotesia congregata bracovirus	Y	1	CTL-S
CcBV32_307	Cc_GSCOCT000130360012-PA gene=cc_ccv32_307	ParWaspDB(https://bipaa.genouest.org/is/parwaspdb/)	Cotesia congregata bracovirus	Y	1	CTL-S
CsBV-CTL	CCQ19178.1	NCBI	Cotesia sesamiae Kitale bracovirus	Y	1	CTL-S
CrBV-CTL1	BAC55179.1	NCBI	Cotesia ruficrus bracovirus	Y	1	CTL-S
CrBV-CTL2	AAO74641.1	NCBI	Cotesia ruficrus bracovirus	Y	1	CTL-S
GfBV-CTL1	ACE75071.1	NCBI	Glyptapanteles flavicoxis bracovirus	Y	1	CTL-S
GfBV-CTL2	ACE75072.1	NCBI	Glyptapanteles flavicoxis bracovirus	Y	1	CTL-S
GfBV-CTL3	ACE75074.1	NCBI	Glyptapanteles flavicoxis bracovirus	Y	1	CTL-S
GiBV-CTL1	ABK56997.1	NCBI	Glyptapanteles indiensis bracovirus	Y	1	CTL-S
GiBV-CTL2	NC_043337.1 Glyptapanteles indiensis bracovirus segment 1, complete sequence-FGENESH prediction by Apis	NCBI	Glyptapanteles indiensis bracovirus	Y	1	CTL-S

## Sheet: S5
Table S5. Table List of primers used in this study
Primer name	Primer sequence (5'-3')	Use
CvBV_28-1-P	ACCGTCAGCCGTCTAAGCTT	Cloning
CvBV_28-1-AP	TTATGGCACAATTTGGAATAAT	Cloning
CvBV_28-1-qPCR-P	TAGACGCATGAGTATTGGGAAGAG	qPCR
CvBV_28-1-qPCR-AP	CCAGTCTTGACTCCAATTGATG	qPCR
Px-β-tubulin-P	GACGCATGTCCATGAAGGAG	qPCR
Px-β-tubulin-AP	CCAATGCAAGAAAGCCTTGC	qPCR
Px-β-actin-P	TGGCACCACACCTTCTAC	qPCR
Px-β-actin-AP	CATGATCTGGGTCATCTTCT	qPCR
DmActin-P	GGCGCAGAGCAAGCGTGGTA	qPCR
DmActin-AP	GGGTGCCACACGCAGCTCAT	qPCR
siCvBV_28-1	GAGACUCACAAUGGGAUCCAGCGAA	RNAi
siNC	UUCUCCGAACGUGUCACGUTT	RNAi
pET32a-CvBV_28-1-P	CCATGGCTGATATC GGATCC ATGCTTTTGCCCGTGGTACT	Protein Purification
pET32a-CvBV_28-1-AP	TGGTGGTGGTGGTG CTCGAG TTACACGCTTGTGCAGAAGA	Protein Purification
pUAST-CvBV_28-1-P	TTCGTTAACAGATCT GCGGCCGC ATGAATAAATTCATTTTCTT	Transgenetic Fly
pUAST-CvBV_28-1-AP	ACAAAGATCCTCTAGAGGTACC TTAAGCGTAATCTGGAACATCGTATGGGTACACGCTTGTGCAGAAGA	Transgenetic Fly
pAc-CvBV_28-1-P	AGTCCAGTGTGGTGGAATTCTGGCATGGGC AATAAATTCATTTTCTT	Tranfection
pAc-CvBV_28-1-AP	GCGGGCCCTCTAGACTCGAGCG TTACACGCTTGTGCAGAAGA	Tranfection
pAc-GFP-P	AGTCCAGTGTGGTGGAATTCTGGCATGGGC GTGAGCAAGGGCGAGGAGC	Tranfection
pAc-GFP-AP	GCGGGCCCTCTAGACTCGAGCG TTACTTGTACAGCTCGTCCAT	Tranfection
	Red sequences are cleavage sites of restriction enzyme.
	Green sequence is hemagglutinin (HA) epitopes tag.
	Blue sequences are the Kozak sequence.
